# Supplementary material for: Fatty acid β-oxidation is required for the differentiation of larval hematopoietic progenitors in Drosophila
Source: eLife. 2020 Jun 12;9:e53247. doi: 10.7554/eLife.53247 (PMC7347386; doi:10.7554/eLife.53247)
Supplement: Figure 1—source data 1. [file elife-53247-fig1-data1.xlsx]

## Sheet: Sheet1
	Mean Fluorescense intensity of Hnf4>GFP expression
	n	Pvf2+	dome+	dome+ Hml+
	1	64.719	181.751	53.463
	2	29.326	215.826	45.014
	3	51.164	175.681	48.416
	4	59.007	144.757	34.582
	5	71.669	147.985	32.824		Pvf2+	dome+	dome+ Hml+
	6	60.438	127.636	31.033		51.2354	166.015	35.1775
	7	48.242	164.188	23.562
	8	37.966	154.188	29.434
	9	40.341	155.767	31.266
	10	49.482	192.37	22.181
	Average	51.2354	166.015	35.1775
	Std dev	13.0437	25.852	10.4433
	ttest		9.54532e-09	0.00734531
	Mean Fluorescense intensity of Nile red staining
	n	Pvf2+	dome+	dome+ Hml+
	1	21.575	53.138	35.657
	2	18.425	67.525	26.838
	3	24.271	62.08	22.615
	4	18.024	64.723	18.656		Pvf2+	dome+	dome+ Hml+
	5	21.274	60.015	31.571		24.0033	72.0458	34.6306
	6	25.02	78.958	39.314
	7	19.53	70.214	37.034
	8	35.388	87.828	40.722
	9	29.112	91.206	44.887
	10	27.414	84.771	49.012
	Average	24.0033	72.0458	34.6306
	Std dev	5.46376	12.9309	9.70416
	ttest		1.38747e-07	0.00911053
