# Supplementary material for: Fatty acid β-oxidation is required for the differentiation of larval hematopoietic progenitors in Drosophila
Source: eLife. 2020 Jun 12;9:e53247. doi: 10.7554/eLife.53247 (PMC7347386; doi:10.7554/eLife.53247)
Supplement: Figure 2—figure supplement 1—source data 1. [file elife-53247-fig2-figsupp1-data1.xlsx]

## Sheet: Sheet1
	Percentage of progenitor sub-populations in primary lobe of lymph gland																		Fraction of progenitor sub-populations in primary lobe of lymph gland
		dome>GFP/+		dome>GFP/+; whd1/whd1																dome>GFP/+		dome>GFP/+; whd1/whd1
	n	progenitor	Intermediate Progenitor	progenitor	Intermediate Progenitor														n	progenitor	Intermediate Progenitor	progenitor	Intermediate Progenitor
	1	36.9201	15.6512	79.1485	12.5673														1	0.369201	0.156512	0.791485	0.125673
	2	28.4868	13.4458	85.357	10.4318				dome>GFP/+	dome>GFP; whd1/whd1									2	0.284868	0.134458	0.85357	0.104318
	3	33.3993	17.1611	84.2466	9.52055			progenitor	30.6573	76.3171									3	0.333993	0.171611	0.842466	0.0952055
	4	30.3061	16.9184	75.7313	12.1963			Intermediate Progenitor	17.793	10.6858									4	0.303061	0.169184	0.757313	0.121963
	5	29.1773	17.7289	71.483	5.59118														5	0.291773	0.177289	0.71483	0.0559118
	6	25.0419	18.4354	73.6872	10.023														6	0.250419	0.184354	0.736872	0.10023
	7	31.6214	17.5593	74.3923	11.322				dome>GFP/+	dome>GFP; whd1/whd1									7	0.316214	0.175593	0.743923	0.11322
	8	33.9339	20.3203	72.5515	10.6479			progenitor	3.40146	4.94252									8	0.339339	0.203203	0.725515	0.106479
	9	29.3836	20	73.7136	14.1019			Intermediate Progenitor	2.23321	2.25506									9	0.293836	0.2	0.737136	0.141019
	10	28.3028	20.7094	72.8598	10.4562														10	0.283028	0.207094	0.728598	0.104562
	Average	30.6573	17.793	76.3171	10.6858														Average	0.306573	0.17793	0.763171	0.106858
	Std dev	3.40146	2.23321	4.94252	2.25506														Std dev	0.0340146	0.0223321	0.0494252	0.0225506
	t test			5.70083e-14	1.33039e-06														t test			5.70083e-14	1.33039e-06
	Percentage of progenitor sub-populations in primary lobe of control lymph gland																																	Ratio of progenitor sub-populations in primary lobe of control lymph gland
		mL2 (36 hr AEH)			eL3 (54 hr AEH)			eL3 (70 hr AEH)			mL3 (84 hr AEH)			lL3 (96 hr AEH)																					mL2 (36 hr AEH)			eL3 (54 hr AEH)			eL3 (70 hr AEH)			mL3 (84 hr AEH)			lL3 (96 hr AEH)
	n	Pre-progenitor	progenitor	Intermediate Progenitor	Pre-progenitor	progenitor	Intermediate Progenitor	Pre-progenitor	progenitor	Intermediate Progenitor	Pre-progenitor	progenitor	Intermediate Progenitor	Pre-progenitor	progenitor	Intermediate Progenitor																		n	Pre-progenitor	progenitor	Intermediate Progenitor	Pre-progenitor	progenitor	Intermediate Progenitor	Pre-progenitor	progenitor	Intermediate Progenitor	Pre-progenitor	progenitor	Intermediate Progenitor	Pre-progenitor	progenitor	Intermediate Progenitor
	1	3.80711	75.6345	4.06091	4.44191	78.5877	6.71982	3.65359	60.7578	6.4276	0.0403551	56.4568	13.3575	0	31.1185	17.7014																		1	0.0380711	0.756345	0.0406091	0.0444191	0.785877	0.0671982	0.0365359	0.607578	0.064276	0.000403551	0.564568	0.133575	0	0.311185	0.177014
	2	2.84974	70.4663	5.18135	6.86695	77.2532	6.43777	2.14022	63.4686	7.74908	0	46.9214	11.8896	0	27.4461	15.8887			mL2(36 hr AEH)	eL3(54 hr AEH)	eL3(70 hr AEH)	mL3(84 hr AEH)	lL3(96 hr AEH)											2	0.0284974	0.704663	0.0518135	0.0686695	0.772532	0.0643777	0.0214022	0.634686	0.0774908	0	0.469214	0.118896	0	0.274461	0.158887
	3	5.66929	78.4252	6.14173	3.49727	87.2131	5.2459	2.57511	71.4592	4.86409	0.0454959	51.0919	8.9172	0	29.8059	15.1571		Pre-progenitor	0.038	0.0497	0.028	0	0											3	0.0566929	0.784252	0.0614173	0.0349727	0.872131	0.052459	0.0257511	0.714592	0.0486409	0.000454959	0.510919	0.089172	0	0.298059	0.151571
	4	2.64901	88.3002	2.20751	5.42005	82.3848	8.13008	3.2634	62.7817	5.43901	0	48.2609	10.6719	0	27.5841	16.1813		progenitor	0.829	0.7985	0.635	0.506	0.309											4	0.0264901	0.883002	0.0220751	0.0542005	0.823848	0.0813008	0.032634	0.627817	0.0543901	0	0.482609	0.106719	0	0.275841	0.161813
	5	4.41176	77.2059	5.63725	3.97456	77.4245	4.61049	2.80679	60.248	8.35509	0.0905797	55.2536	10.1902	0	32.0199	14.1704		Intermediate Progenitor	0.0447	0.062	0.066	0.105	0.167											5	0.0441176	0.772059	0.0563725	0.0397456	0.774245	0.0461049	0.0280679	0.60248	0.0835509	0.000905797	0.552536	0.101902	0	0.320199	0.141704
	6	4.25963	83.9757	5.88235	7.23404	77.305	4.68085	1.61663	61.5089	6.77444	0	53.5414	5.39871	0	25.117	16.4665																		6	0.0425963	0.839757	0.0588235	0.0723404	0.77305	0.0468085	0.0161663	0.615089	0.0677444	0	0.535414	0.0539871	0	0.25117	0.164665
	7	4.89039	89.882	4.04722	4.55882	75.2941	3.67647	2.32558	58.9744	7.75194	0	48.7785	10.1792	0	35.7089	18.0176			mL2(36 hr AEH)	eL3(54 hr AEH)	eL3(70 hr AEH)	mL3(84 hr AEH)	lL3(96 hr AEH)											7	0.0489039	0.89882	0.0404722	0.0455882	0.752941	0.0367647	0.0232558	0.589744	0.0775194	0	0.487785	0.101792	0	0.357089	0.180176
	8	2.31362	86.6324	4.62725	3.87275	82.7109	6.639	3.71069	60.8805	8.80503	0	45.4642	10.6368	0	38.179	21.3067		Pre-progenitor	0.0116295	0.0133356	0.00684848	0	0											8	0.0231362	0.866324	0.0462725	0.0387275	0.827109	0.06639	0.0371069	0.608805	0.0880503	0	0.454642	0.106368	0	0.38179	0.213067
	9	4.91453	89.9573	4.48718	5.98886	80.0836	7.52089	3.38617	58.7896	4.32277	0	46.009	10.0904	0	31.8107	15.5266		progenitor	0.0697299	0.0350443	0.0572878	0.0402461	0.0389811											9	0.0491453	0.899573	0.0448718	0.0598886	0.800836	0.0752089	0.0338617	0.587896	0.0432277	0	0.46009	0.100904	0	0.318107	0.155266
	10	2.68456	88.8143	2.46085	3.86152	80.2929	8.52197	2.87897	76.1457	5.34665	0.0471921	53.9405	13.7329	0.0243843	29.9195	16.5813		Intermediate Progenitor	0.01341	0.0161557	0.0155511	0.02345	0.019752											10	0.0268456	0.888143	0.0246085	0.0386152	0.802929	0.0852197	0.0287897	0.761457	0.0534665	0.000471921	0.539405	0.137329	0.000243843	0.299195	0.165813
	Average	3.84497	82.9294	4.47336	4.97167	79.855	6.21832	2.83571	63.5014	6.58357	0.0223623	50.5718	10.5064	0.00243843	30.871	16.6998																		Average	0.0384497	0.829294	0.0447336	0.0497167	0.79855	0.0621832	0.0283571	0.635014	0.0658357	0.000223623	0.505718	0.105064	2.43843e-05	0.30871	0.166998
	Std dev	1.16295	6.97299	1.341	1.33356	3.50443	1.61557	0.684848	5.72878	1.55511	0.0318494	4.02461	2.345	0.00771099	3.89811	1.9752																		Std dev	0.0116295	0.0697299	0.01341	0.0133356	0.0350443	0.0161557	0.00684848	0.0572878	0.0155511	0.000318494	0.0402461	0.02345	7.71099e-05	0.0389811	0.019752
	t test				0.0595309	0.234391	0.0173825	0.0323869	2.73987e-06	0.0045455		3.20802e-09	4.99901e-06		6.11685e-12	2.81267e-11																		t test				0.0595309	0.234391	0.0173825	0.0323869	2.73987e-06	0.0045455		3.20802e-09	4.99901e-06		6.11685e-12	2.81267e-11
	Percentage of progenitor sub-populations in primary lobe of whd1/whd1 lymph gland																																	Ratio of progenitor sub-populations in primary lobe of whd1/whd1 lymph gland
		mL2 (36 hr AEH)			eL3 (54 hr AEH)			eL3 (70 hr AEH)			mL3 (84 hr AEH)			lL3 (96 hr AEH)																					mL2 (36 hr AEH)			eL3 (54 hr AEH)			eL3 (70 hr AEH)			mL3 (84 hr AEH)			lL3 (96 hr AEH)
	n	Pre-progenitor	progenitor	Intermediate Progenitor	Pre-progenitor	progenitor	Intermediate Progenitor	Pre-progenitor	progenitor	Intermediate Progenitor	Pre-progenitor	progenitor	Intermediate Progenitor	Pre-progenitor	progenitor	Intermediate Progenitor																		n	Pre-progenitor	progenitor	Intermediate Progenitor	Pre-progenitor	progenitor	Intermediate Progenitor	Pre-progenitor	progenitor	Intermediate Progenitor	Pre-progenitor	progenitor	Intermediate Progenitor	Pre-progenitor	progenitor	Intermediate Progenitor
	1	6.47668	82.6425	1.29534	3.82932	87.4179	7.33042	0.592593	88.7407	4.14815	0.03861	84.8649	7.91506	0	73.7468	12.1519			mL2(36 hr AEH)	eL3(54 hr AEH)	eL3(70 hr AEH)	mL3(84 hr AEH)	lL3(96 hr AEH)											1	0.0647668	0.826425	0.0129534	0.0382932	0.874179	0.0733042	0.00592593	0.887407	0.0414815	0.0003861	0.848649	0.0791506	0	0.737468	0.121519
	2	4.34783	81.401	1.44928	4.62725	87.4036	7.58355	0.805369	85.906	1.67785	0	80.3138	7.0975	0	77.887	8.53556		Pre-progenitor	0.0534318	0.0400088	0.011113	0.000121529	0											2	0.0434783	0.81401	0.0144928	0.0462725	0.874036	0.0758355	0.00805369	0.85906	0.0167785	0	0.803138	0.070975	0	0.77887	0.0853556
	3	4.05644	88.0071	2.29277	2.13964	90.3153	2.59009	1.8297	91.4849	1.47783	0.0829187	87.1891	5.84577	0	85.1013	9.51132		progenitor	0.839806	0.878749	0.86097	0.828996	0.756674											3	0.0405644	0.880071	0.0229277	0.0213964	0.903153	0.0259009	0.018297	0.914849	0.0147783	0.000829187	0.871891	0.0584577	0	0.851013	0.0951132
	4	5.42169	82.1285	1.40562	2.65823	88.3544	7.08861	0.724638	87.5362	1.37681	0	75.0846	11.0861	0	74.1371	11.785		Intermediate Progenitor	0.0252127	0.0560047	0.0357274	0.0799992	0.103929											4	0.0542169	0.821285	0.0140562	0.0265823	0.883544	0.0708861	0.00724638	0.875362	0.0137681	0	0.750846	0.110861	0	0.741371	0.11785
	5	6.38298	84.4681	3.82979	3.6129	89.9355	5.16129	0.387597	79.1473	6.04651	0	86.2762	8.46516	0	75.0663	6.07543																		5	0.0638298	0.844681	0.0382979	0.036129	0.899355	0.0516129	0.00387597	0.791473	0.0604651	0	0.862762	0.0846516	0	0.750663	0.0607543
	6	6.42674	82.7763	2.31362	5.32319	87.3257	6.33714	0.931099	88.6406	4.65549	0	85.987	8.1128	0	72.0948	9.55246			mL2(36 hr AEH)	eL3(54 hr AEH)	eL3(70 hr AEH)	mL3(84 hr AEH)	lL3(96 hr AEH)											6	0.0642674	0.827763	0.0231362	0.0532319	0.873257	0.0633714	0.00931099	0.886406	0.0465549	0	0.85987	0.081128	0	0.720948	0.0955246
	7	6.21242	82.9659	2.20441	5.95611	90.5956	3.9185	1.16518	82.1796	6.78547	0	81.7507	6.99492	0	77.0747	11.2765		Pre-progenitor	0.0131744	0.0128997	0.00519784	0	0											7	0.0621242	0.829659	0.0220441	0.0595611	0.905956	0.039185	0.0116518	0.821796	0.0678547	0	0.817507	0.0699492	0	0.770747	0.112765
	8	6.69975	81.3896	3.47395	2.73292	86.9565	4.2236	1.8746	83.969	1.16354	0	83.8852	8.57248	0	72.7105	10.7944		progenitor	0.0304838	0.0254146	0.0366675	0.0359908	0.0378263											8	0.0669975	0.813896	0.0347395	0.0273292	0.869565	0.042236	0.018746	0.83969	0.0116354	0	0.838852	0.0857248	0	0.727105	0.107944
	9	2.85036	90.7363	2.13777	5.37772	88.7324	4.73752	1.61744	84.7398	4.782	0	81.1111	7.96296	0	73.4539	13.4686		Intermediate Progenitor	0.0115942	0.0171472	0.0205519	0.0135636	0.0208582											9	0.0285036	0.907363	0.0213777	0.0537772	0.887324	0.0473752	0.0161744	0.847398	0.04782	0	0.811111	0.0796296	0	0.734539	0.134686
	10	4.55696	83.2911	4.81013	3.75147	81.7116	7.034	1.18483	88.6256	3.61374	0	82.5334	7.9465	0	75.4015	10.7777																		10	0.0455696	0.832911	0.0481013	0.0375147	0.817116	0.07034	0.0118483	0.886256	0.0361374	0	0.825334	0.079465	0	0.754015	0.107777
	Average	5.34318	83.9806	2.52127	4.00088	87.8749	5.60047	1.1113	86.097	3.57274	0.0121529	82.8996	7.99992	0	75.6674	10.3929																		Average	0.0534318	0.839806	0.0252127	0.0400088	0.878749	0.0560047	0.011113	0.86097	0.0357274	0.000121529	0.828996	0.0799992	0	0.756674	0.103929
	Std dev	1.31744	3.04838	1.15942	1.28997	2.54146	1.71472	0.519784	3.66675	2.05519	0.0276673	3.59908	1.35636	0	3.78263	2.08582																		Std dev	0.0131744	0.0304838	0.0115942	0.0128997	0.0254146	0.0171472	0.00519784	0.0366675	0.0205519	0.000276673	0.0359908	0.0135636	0	0.0378263	0.0208582
	t test				0.033488	0.00631857	0.000246398	7.85011e-07	0.178046	0.180319		0.478137	1.75296e-08		4.47338e-05	5.2474e-08																		t test				0.033488	0.00631857	0.000246398	7.85011e-07	0.178046	0.180319		0.478137	1.75296e-08		4.47338e-05	5.2474e-08
	Differentiation level in FAO gene null loss of function
	n	OreR	Hnf4Δ17/ Hnf4Δ33	MtpαKO	MtpβKO	whd1/whd1
	1	0.625	0.162	0.284	0.235	0.059
	2	0.519	0.225	0.237	0.171	0.089
	3	0.661	0.242	0.256	0.259	0.092	OreR	Hnf4Δ17/ Hnf4Δ33	MtpαKO	MtpβKO	whd1/whd1
	4	0.605	0.199	0.193	0.118	0.078	0.5727	0.1929	0.211	0.2076	0.0915
	5	0.702	0.185	0.206	0.203	0.112
	6	0.508	0.204	0.153	0.255	0.108
	7	0.523	0.118	0.195	0.167	0.098
	8	0.485	0.147	0.214	0.189	0.082
	9	0.578	0.219	0.239	0.191	0.132
	10	0.521	0.228	0.133	0.288	0.065
	Average	0.5727	0.1929	0.211	0.2076	0.0915
	Std dev	0.0732015	0.0397896	0.0457967	0.0513835	0.0221422
	ttest		9.53548e-10	1.01039e-09	6.36913e-10	9.33331e-10
	Differentiation level in lymph gland with FAO blocked by pharmaceutical inhibitors
	n	dome/+	dome/+ +Etomoxir	dome/+ +Mildronate
	1	0.464	0.185	0.221
	2	0.49	0.192	0.153
	3	0.501	0.201	0.219
	4	0.498	0.22	0.208		dome/+	0.4871
	5	0.539	0.148	0.259		dome/+ +Etomoxir	0.2025
	6	0.517	0.231	0.173		dome/+ +Mildronate	0.2083
	7	0.435	0.168	0.219
	8	0.443	0.247	0.24
	9	0.489	0.225	0.202
	10	0.495	0.208	0.189
	Average	0.4871	0.2025	0.2083
	Standard Deviation	0.0319146	0.0302113	0.0310593
	Student's t-test		6.80388e-14	1.16534e-13
	Differentiation level in whd RNAiKK knockdown from TepIV-GAL4 hemocyte progenitor
	n	TepIV-Gal4	TepIV > whd.i
	1	0.489	0.198
	2	0.602	0.206
	3	0.587	0.158		TepIV-Gal4	0.5196
	4	0.506	0.139		TepIV > whd.i	0.1953
	5	0.467	0.176
	6	0.551	0.203
	7	0.579	0.268
	8	0.442	0.199
	9	0.508	0.213
	10	0.465	0.193
	Average	0.5196	0.1953
	Standard Deviation	0.0566396	0.0345319
	Student's t-test		1.4265e-10
