# Supplementary material for: Fatty acid β-oxidation is required for the differentiation of larval hematopoietic progenitors in Drosophila
Source: eLife. 2020 Jun 12;9:e53247. doi: 10.7554/eLife.53247 (PMC7347386; doi:10.7554/eLife.53247)
Supplement: Figure 2—source data 1. [file elife-53247-fig2-data1.xlsx]

## Sheet: Sheet1
	Differentiation level in whd null loss of function
	n	dome/+	dome/+; whd1/whd1
	1	0.584	0.096
	2	0.467	0.085
	3	0.502	0.083
	4	0.498	0.064			dome/+	0.5101
	5	0.508	0.073			dome/+; whd1/whd1	0.075
	6	0.545	0.078
	7	0.599	0.075
	8	0.42	0.068
	9	0.481	0.052
	10	0.497	0.076
	Average	0.5101	0.075
	Standard Deviation	0.0535339	0.0121014
	Student's t-test		2.67269e-10
	Number of proPO positive crystal cells (NORMALIZED BY DAPI)						Percentage of proPO positive crystal cells per primary lobe (NORMALIZED BY DAPI)
	n	dome/+	dome/+; whd1/whd1				n	dome/+	dome/+; whd1/whd1
	1	0.0102258	0.00185839				1	1.02258	0.185839
	2	0.0121413	0.0058045				2	1.21413	0.58045
	3	0.0100802	0.00736867				3	1.00802	0.736867		dome/+	1.14044
	4	0.0122268	0.00488115				4	1.22268	0.488115		dome/+; whd1/whd1	0.5185
	5	0.00825614	0.00408778				5	0.825614	0.408778
	6	0.0139295	0.00704978				6	1.39295	0.704978
	7	0.0106257	0.00375747				7	1.06257	0.375747
	8	0.0107647	0.0059081				8	1.07647	0.59081
	9	0.01263	0.0076137				9	1.263	0.76137
	10	0.0131643	0.00352044				10	1.31643	0.352044
	Average	0.0114044	0.005185				Average	1.14044	0.5185
	Standard Deviation	0.00170828	0.00189215				Standard Deviation	0.170828	0.189215
	Student's t-test		4.37926e-07				Student's t-test		4.37926e-07
	Differentiation levels in primary lobe of lymph gland
	n	dome/+	dome>whd.i	dome> sgRNA-whd	dome>hnf4.i
	1	0.484	0.168	0.105	0.301
	2	0.497	0.179	0.083	0.265
	3	0.502	0.182	0.113	0.273		dome/+	0.4961
	4	0.498	0.172	0.101	0.24		dome>whd.i	0.1993
	5	0.508	0.201	0.099	0.256		dome> sgRNA-whd	0.1017
	6	0.545	0.241	0.102	0.198		dome>hnf4.i	0.2498
	7	0.499	0.238	0.108	0.239
	8	0.48	0.216	0.069	0.238
	9	0.481	0.22	0.125	0.258
	10	0.467	0.176	0.112	0.23
	Average	0.4961	0.1993	0.1017	0.2498
	Standard Deviation	0.0212417	0.0277411	0.0158258	0.0277361
	Student's t-test		2.83689e-15	3.84062e-19	6.03742e-14
