# Supplementary material for: Fatty acid β-oxidation is required for the differentiation of larval hematopoietic progenitors in Drosophila
Source: eLife. 2020 Jun 12;9:e53247. doi: 10.7554/eLife.53247 (PMC7347386; doi:10.7554/eLife.53247)
Supplement: Figure 3—figure supplement 1—source data 1. [file elife-53247-fig3-figsupp1-data1.xlsx]

## Sheet: Sheet1
	Mean fluorescense intensity of Ci155 expression
	n	dome>GFP/+	d>GFP; whd1/whd1
	1	87.256	133.862
	2	95.772	104.287
	3	69.695	156.748			dome>GFP/+	74.9528
	4	56.36	121.513			d>GFP; whd1/whd1	141.324
	5	70.307	146.17
	6	71.46	159.614
	7	61.239	147.56
	8	86.31	154.164
	9	67.195	139.677
	10	83.934	149.643
	Average	74.9528	141.324
	Standard Deviation	12.6922	17.2931
	Student's t-test		2.78104e-08
	Mean fluorescense intensity of DHE(ROS) staining
	n	dome>GFP/+	d>GFP; whd1/whd1
	1	84.311	166.076
	2	87.841	178.378
	3	58.786	132.635		dome>GFP/+	78.1663
	4	77.157	165.942		d>GFP; whd1/whd1	147.708
	5	75.009	131.19
	6	81.675	151.663
	7	69.224	154.904
	8	73.138	152.893
	9	78.621	123.879
	10	95.901	119.524
	Average	78.1663	147.708
	Standard Deviation	10.2752	19.9082
	Student's t-test		1.63663e-07
