# Supplementary material for: Fatty acid β-oxidation is required for the differentiation of larval hematopoietic progenitors in Drosophila
Source: eLife. 2020 Jun 12;9:e53247. doi: 10.7554/eLife.53247 (PMC7347386; doi:10.7554/eLife.53247)
Supplement: Figure 3—source data 1. [file elife-53247-fig3-data1.xlsx]

## Sheet: Sheet1
	Ratio of EdU+ progenitors with respect to total number of Hoechst+ cells per primary lobe
	n	dome>GFP	dome>GFP; whd1/whd1
	1	0.00287724	0.045068
	2	0.00338983	0.0351166
	3	0.00590551	0.0419501			dome>GFP	0.0043466
	4	0.00580552	0.0387026			dome>GFP; whd1/whd1	0.0440189
	5	0.00379784	0.0283377
	6	0.00465116	0.0279923
	7	0.00630749	0.0522546
	8	0.0027439	0.0510929
	9	0.00566864	0.0619416
	10	0.00231884	0.0577325
	Average	0.0043466	0.0440189
	Standard Deviation	0.00150186	0.0117511
	Student's t-test		1.7123e-06
																							Red(S)	Green(G1)	Yellow(G2/M)
	Ratio of FUCCI+ progenitors with respect to total number of Hoechst+ cells per primary lobe																					dome>FUCCI	0.0433756	0.0454695	0.203118
		dome > FUCCI			dome > FUCCI>whd RNAi						dome > FUCCI						dome > FUCCI>whd RNAi					dome>FUCCI>whd RNAi	0.244971	0.132962	0.111912
	n	Red	Green	Yellow	Red	Green	Yellow				Red	Green	Yellow				Red	Green	Yellow
	1	0.0595611	0.0222571	0.209091	0.236471	0.0377678	0.0916009				0.0433756	0.0454695	0.203118				0.244971	0.132962	0.111912
	2	0.0297963	0.0586804	0.263606	0.274044	0.13306	0.0669399
	3	0.0512262	0.0435967	0.152589	0.201734	0.0997195	0.167304
	4	0.0311688	0.0524675	0.204935	0.238667	0.157067	0.0813333
	5	0.0526906	0.0445628	0.185538	0.224293	0.21883	0.160026
	6	0.0380879	0.0531697	0.210123	0.238969	0.143009	0.0738969
	7	0.0332389	0.0425148	0.175728	0.282462	0.104	0.0787692
	8	0.0458293	0.0455868	0.206596	0.232938	0.145994	0.121365
	9	0.049271	0.0449975	0.224736	0.261559	0.160753	0.150806
	10	0.0428855	0.0468617	0.198239	0.258576	0.129418	0.127079
	Average	0.0433756	0.0454695	0.203118	0.244971	0.132962	0.111912
	Standard Deviation	0.0100858	0.00964277	0.029557	0.0242689	0.0471592	0.0381941
	Student's t-test				1.41022e-11	0.000204436	1.54014e-05
