# Supplementary material for: Fatty acid β-oxidation is required for the differentiation of larval hematopoietic progenitors in Drosophila
Source: eLife. 2020 Jun 12;9:e53247. doi: 10.7554/eLife.53247 (PMC7347386; doi:10.7554/eLife.53247)
Supplement: Figure 4—figure supplement 1—source data 1. [file elife-53247-fig4-figsupp1-data1.xlsx]

## Sheet: Sheet1
	Differentiation level in whd mutant fed with L-carnitine
	n	dome/+	dome/+; whd1/whd1	dome/+; whd1/+	dome/+; whd1/+ +L-carnitine
	1	0.592	0.068	0.223	0.59
	2	0.551	0.051	0.211	0.551
	3	0.495	0.092	0.35	0.471		dome/+	0.547
	4	0.482	0.059	0.195	0.402		dome/+; whd1/whd1	0.0677
	5	0.547	0.055	0.136	0.633		dome/+; whd1/+	0.2294
	6	0.568	0.089	0.258	0.448		dome/+; whd1/+ +L-carnitine	0.4934
	7	0.582	0.063	0.224	0.492
	8	0.436	0.061	0.211	0.431
	9	0.627	0.058	0.319	0.472
	10	0.59	0.081	0.167	0.444
	Average	0.547	0.0677	0.2294	0.4934
	Standard Deviation	0.0588841	0.0145224	0.0649259	0.0744225
	Student's t-test		2.07691e-10	1.17912e-09	1.27394e-07
