# Supplementary material for: Fatty acid β-oxidation is required for the differentiation of larval hematopoietic progenitors in Drosophila
Source: eLife. 2020 Jun 12;9:e53247. doi: 10.7554/eLife.53247 (PMC7347386; doi:10.7554/eLife.53247)
Supplement: Figure 4—source data 1. [file elife-53247-fig4-data1.xlsx]

## Sheet: Sheet1
	Differentiation level in L-carnitine feeding
	n	dome > GFP	dome > GFP, +L-carnitine
	1	0.534	0.791
	2	0.492	0.822				dome > GFP	0.4987
	3	0.512	0.734				dome > GFP, +L-carnitine	0.7882
	4	0.491	0.801
	5	0.437	0.758
	6	0.558	0.825
	7	0.519	0.698
	8	0.502	0.892
	9	0.514	0.755
	10	0.428	0.806
	Average	0.4987	0.7882
	Standard Deviation	0.0401471	0.0546175
	Student's t-test		2.36574e-10
	Differentiation level in whd overexpression
	n	dome > GFP	dome > GFP > whd-OE
	1	0.459	0.83
	2	0.52	0.815				dome > GFP	0.4956
	3	0.524	0.766				dome > GFP > whd-OE	0.8318
	4	0.472	0.867
	5	0.463	0.852
	6	0.558	0.871
	7	0.542	0.769
	8	0.469	0.881
	9	0.462	0.769
	10	0.487	0.898
	Average	0.4956	0.8318
	Standard Deviation	0.0369961	0.0499884
	Student's t-test		5.82191e-12
	Ratio of EdU+ progenitors with respect to total number of DAPI+ cells per primary lobe
		dome > GFP	dome > GFP, +L-carnitine
		0.312727	0.0642202
	2	0.166667	0.108571
	3	0.188917	0.059448
	4	0.227987	0.0632653
	5	0.22619	0.0365385				dome > GFP	0.214867
	6	0.222107	0.0688776				dome > GFP, +L-carnitine	0.0651085
	7	0.162245	0.0838816
	8	0.106754	0.087234
	9	0.210667	0.0352697
	10	0.324405	0.0437788
	Average	0.214867	0.0651085
	Standard Deviation	0.0661646	0.0234355
	Student's t-test		2.8698e-05
	Ratio of EdU+ progenitors with respect to total number of DAPI+ cells per primary lobe
	n	dome > GFP	dome > GFP>whd-OE
	1	0.167874	0.0322581
	2	0.226744	0.0381526
	3	0.219388	0.0382166
	4	0.151923	0.0305164				dome > GFP	0.193409
	5	0.184783	0.0474576				dome > GFP>whd-OE	0.0421459
	6	0.174825	0.0368098
	7	0.237975	0.0304878
	8	0.180606	0.0615385
	9	0.185984	0.0496575
	10	0.203991	0.0563636
	Average	0.193409	0.0421459
	Standard Deviation	0.027681	0.0110133
	Student's t-test		2.27964e-09
	Ratio of FUCCI+ progenitors with respect to total number of Hoechst+ cells per primary lobe
		dome > FUCCI			dome > FUCCI +L-carnitine
	n	Red	Green	Yellow	Red	Green	Yellow
	1	0.347368	0.104094	0.0795322	0.0917031	0.080786	0.183406
	2	0.239583	0.05625	0.0541667	0.0730769	0.1	0.180769			dome > FUCCI			dome > FUCCI +L-carnitine							Red(S)	Green(G1)	Yellow(G2/M)
	3	0.240602	0.210526	0.0889724	0.04375	0.15	0.289583		Red	Green	Yellow		Red	Green	Yellow				dome> FUCCI	0.283661	0.102123	0.0959758
	4	0.241026	0.0679487	0.101282	0.0899654	0.153979	0.221453		0.283661	0.102123	0.0959758		0.0930173	0.117262	0.206803				dome> FUCCI>whd.i	0.0930173	0.128678	0.206803
	5	0.236111	0.0914352	0.103009	0.0959184	0.0734694	0.216327
	6	0.240927	0.0856855	0.0725806	0.0928	0.104	0.1808
	7	0.301887	0.1582	0.137881	0.115254	0.133898	0.155932
	8	0.385445	0.109164	0.105121	0.164384	0.226027	0.276256
	9	0.339953	0.0689252	0.078271	0.0762565	0.117851	0.142114
	10	0.263705	0.0689981	0.138941	0.0870647	0.146766	0.221393
	Average	0.283661	0.102123	0.0959758	0.0930173	0.128678	0.206803
	Standard Deviation	0.0557969	0.0480802	0.0272674	0.0311776	0.0444927	0.0481528
	Student's t-test				1.78495e-07	0.216242	1.71266e-05

## Sheet: Sheet2
	n	Dome>GFP/+	D>GFP; whd1/whd1
	1	87.256	133.862
	2	95.772	104.287
	3	69.695	156.748
	4	56.36	121.513
	5	70.307	146.17
	6	71.46	159.614
	7	61.239	147.56
	8	86.31	154.164
	9	67.195	139.677
	10	83.934	149.643
	Average	74.9528	141.324
	Standard Deviation	12.6922	17.2931
	Student's t-test		2.78104e-08
	n	Dome>GFP	Dome>GFP; whd1/whd1
	1	4	159
	2	8	108
	3	15	148
	4	13	115
	5	7	93
	6	10	87
	7	19	117
	8	5	136
	9	16	119
	10	4	75
	Average	10.1	115.7
	Standard Deviation	5.38413	26.6627
	Student's t-test		3.05506e-07
		Dome > FUCCI			Dome > FUCCI>whd RNAi						Dome > FUCCI						Dome > FUCCI>whd RNAi
	n	Red	Green	Yellow	Red	Green	Yellow				Red	Green	Yellow				Red	Green	Yellow
	1	109	128	331	239	129	102				81.3	78.1	318.9				248.3	124.8	159.7
	2	57	68	239	224	94	199
	3	76	79	250	297	149	171
	4	99	80	365	280	155	162
	5	47	63	356	242	111	155
	6	63	69	340	199	97	180
	7	105	105	309	289	174	173
	8	118	93	325	251	109	181
	9	49	41	341	237	88	167
	10	70	55	333	225	142	107
	Average	79.3	78.1	318.9	248.3	124.8	159.7
	Standard Deviation	26.3525	25.3046	42.2255	31.3725	29.3402	31.4503
	Student's t-test
