# Supplementary material for: Fatty acid β-oxidation is required for the differentiation of larval hematopoietic progenitors in Drosophila
Source: eLife. 2020 Jun 12;9:e53247. doi: 10.7554/eLife.53247 (PMC7347386; doi:10.7554/eLife.53247)
Supplement: Figure 5—figure supplement 1—source data 1. [file elife-53247-fig5-figsupp1-data1.xlsx]

## Sheet: Sheet1
		Mean fluorescence intensity of 2-NBDG staining
	n	dome-EBFP+	dome-EBFP+Hml+	dome-EBFP-Hml+
	1	19.153	36.282	53.346
	2	11.751	15.064	50.679
	3	9.576	20.877	41.141
	4	8.89	19.528	38.091			dome-EBFP+	dome-EBFP+ Hml+	dome-EBFP- Hml+
	5	11.351	15.02	50.72			12.1763	24.0116	58.5285
	6	11.046	24.737	59.564
	7	17.937	31.846	63.765
	8	11.908	27.826	70.497
	9	8.491	20.662	73.731
	10	11.66	28.274	83.751
	Average	12.1763	24.0116	58.5285
	Standard Deviation	3.58207	7.04936	14.5621
	t test		0.000363531	1.83475e-06
