# Supplementary material for: Fatty acid β-oxidation is required for the differentiation of larval hematopoietic progenitors in Drosophila
Source: eLife. 2020 Jun 12;9:e53247. doi: 10.7554/eLife.53247 (PMC7347386; doi:10.7554/eLife.53247)
Supplement: Figure 5—source data 1. [file elife-53247-fig5-data1.xlsx]

## Sheet: Sheet1
	ATP measurement
	n	OreR	whd1/whd1
	1	100	96
	2	100	95			OreR	100
	3	100	98			whd1/whd1	96.3333
	Average	100	96.3333
	Standard Deviation	0	1.52753
	Student's t-test		0.0532707
	Hex-A transcript level
		Hex-A
	n	w1118	whd1/whd1			w1118	1
	set 1	1	1.7			whd1/whd1	1.60333
	set 2	1	1.55
	set 3	1	1.56
	Average	1	1.60333
	Standard Deviation	0	0.083865
	Student's t-test		0.00637902
	Pfk tanscript level
		Pfk
		w1118	whd1/whd1			w1118	1
	set 1	1	1.78			whd1/whd1	1.70667
	set 2	1	1.63
	set 3	1	1.71
	Average	1	1.70667
	Standard Deviation	0	0.0750555
	Student's t-test		0.00373916
	Differentiation levels in primary lobe of lymph gland in glycolytic inhibition
	n	dome>GFP	dome>GFP; whd1/whd1	dome>GFP; whd1/whd1 +2DG	dome>GFP; whd1/whd1; UAS-Glut1 RNAi
	1	0.479	0.0798	0.144	0.079
	2	0.426	0.092	0.122	0.098		dome>GFP	0.5031
	3	0.586	0.087	0.079	0.102		dome>GFP; whd1/whd1	0.08178
	4	0.491	0.069	0.078	0.09		dome>GFP; whd1/whd1 +2DG	0.0977
	5	0.548	0.086	0.098	0.091		dome>GFP; whd1/whd1; UAS-Glut1 RNAi	0.0947
	6	0.443	0.086	0.071	0.072
	7	0.541	0.09	0.09	0.121
	8	0.489	0.056	0.115	0.102
	9	0.523	0.108	0.096	0.094
	10	0.505	0.064	0.084	0.098
	Average	0.5031	0.08178	0.0977	0.0947
	Standard Deviation	0.048542	0.0151671	0.0229349	0.0134085
	Student's t-test		4.43387e-11	0.0862717	0.0589598
	Mean fluorescence intensity of 2-NBDG in Dome+ progenitors
	n	dome-EBFP/+; +/+	dome-EBFP/+; whd1/ whd1
	1	17.542	130.84
	2	22.781	80.69
	3	14.087	86.542		dome-EBFP/+; +/+	21.0779
	4	21.672	75.451		dome-EBFP/+; whd1/ whd1	93.4267
	5	24.317	78.608
	6	23.266	91.594
	7	19.057	125.905
	8	25.31	91.508
	9	21.284	80.069
	10	21.463	93.06
	Average	21.0779	93.4267
	Standard Deviation	3.36805	19.4152
	Student's t-test		6.09042e-07
	Ratio of EdU+ progenitors with respect to total number of DAPI+ cells per primary lobe
	n	dome>GFP	dome>GFP; whd1/whd1	dome>GFP; whd1/whd1 +2DG	dome>GFP; whd1/whd1; UAS-Glut1 RNAi
	1	0.00399263	0.046396	0.00450161	0.0044757
	2	0.00356189	0.0331476	0.00397351	0.00628099
	3	0.00644258	0.0428135	0.00377358	0.00673854
	4	0.00516304	0.0438692	0.0047619	0.00502513
	5	0.00500695	0.0305913	0.00576631	0.0029051
	6	0.00321637	0.0279923	0.002589	0.00418118		dome>GFP	0.00473345
	7	0.00630749	0.0480874	0.00201342	0.0046875		dome>GFP; whd1/whd1	0.0432631
	8	0.00473373	0.0497253	0.00310988	0.00739437		dome>GFP; whd1/whd1 +2DG	0.00360023
	9	0.00384221	0.0546479	0.00347222	0.00599647		dome>GFP; whd1/whd1; UAS-Glut1 RNAi	0.00548981
	10	0.00506757	0.0553607	0.00204082	0.00721311
	Average	0.00473345	0.0432631	0.00360023	0.00548981
	Stdv	0.00109478	0.00970384	0.00121346	0.00146517
	ttest		4.36674e-07	3.24748e-07	4.53256e-07
