# Supplementary material for: Fatty acid β-oxidation is required for the differentiation of larval hematopoietic progenitors in Drosophila
Source: eLife. 2020 Jun 12;9:e53247. doi: 10.7554/eLife.53247 (PMC7347386; doi:10.7554/eLife.53247)
Supplement: Figure 6—figure supplement 1—source data 1. [file elife-53247-fig6-figsupp1-data1.xlsx]

## Sheet: Sheet1
		Mean fluorescense intensity of H3K9 ac labeling in progenitors
		n	Control H3K9	Ay>whd.i H3K9
		1	129.56	131.19
		2	139.35	134.212
		3	121.754	119.408				Control H3K9 ac	122.164
		4	129.246	139.094				Ay>whd.i H3K9 ac	126.695
		5	115.25	133.345
		6	141.281	132.778
		7	107.458	107.145
		8	114.216	104.355
		9	118.282	138.69
		10	105.241	126.728
		Average	122.164	126.695
		Standard Deviation	12.4478	12.4273
		Student's t-test		0.425979
		Mean fluorescense intensity of H4 ac labeling in progenitors
		n	Control H4ac	Ay>whd.i H4ac
		1	121.66	112.585
		2	134.436	143.885				Control H4ac	126.29
		3	123.52	119.772				Ay>whd.i H4ac	124.171
		4	119.46	131.993
		5	145.336	121.21
		6	122.594	134.789
		7	115.682	105.452
		8	128.395	103.456
		9	129.928	139.78
		10	121.884	128.789
		Average	126.29	124.171
		Standard Deviation	8.6161	14.0214
		Student's t-test		0.689736
		Mean fluorescense intensity of H3 labeling in progenitors
		n	dome>GFP/+	dome>GFP>whd.i
		1	83.254	84.669
		2	66.452	83.624				dome>GFP/+	75.3469
		3	58.774	61.926				dome>GFP>whd.i	71.1495
		4	69.48	59.882
		5	92.458	77.68
		6	68.167	95.287
		7	89.226	55.278
		8	77.044	64.771
		9	66.946	68.55
		10	81.668	59.828
		Average	75.3469	71.1495
		Standard Deviation	11.061	13.3467
		Student's t-test		0.454102
		Mean fluorescense intensity of H3K9 ac labeling in progenitors
		n	dome>GFP/+	dome>GFP>whd.i
		1	103.54	94.259
		2	126.665	73.556
		3	125.742	69.95
		4	169.24	58.248				dome>GFP/+	123.183
		5	98.558	78.05				dome>GFP>whd.i	71.8819
		6	118.136	105.847
		7	109.279	68.781
		8	129.425	62.525
		9	119.288	55.885
		10	131.96	51.718
		Average	123.183	71.8819
		Standard Deviation	19.6698	17.1415
		Student's t-test		7.86622e-06
		Mean fluorescense intensity of H4ac labeling in progenitors
		n	dome>GFP/+	dome>GFP>whd.i
		1	138.446	99.449
		2	146.33	79.216				dome>GFP/+	145.771
		3	131.742	94.332				dome>GFP>whd.i	81.1014
		4	148.188	48.28
		5	109.112	91.182
		6	139.25	95.543
		7	181.687	69.661
		8	148.781	60.09
		9	165.279	79.98
		10	148.896	93.281
		Average	145.771	81.1014
		Standard Deviation	19.2422	17.077
		Student's t-test		2.95798e-07
