# Supplementary material for: Fatty acid β-oxidation is required for the differentiation of larval hematopoietic progenitors in Drosophila
Source: eLife. 2020 Jun 12;9:e53247. doi: 10.7554/eLife.53247 (PMC7347386; doi:10.7554/eLife.53247)
Supplement: Figure 6—source data 1. [file elife-53247-fig6-data1.xlsx]

## Sheet: Sheet1
		Differentiation levels in primary lobe of lymph gland
	n	dome > GFP	d> chm.i	d > Gcn5.i	d > AcCoAS.i	d; whd1/whd1	d; whd1/ATPCL01466	d; whd1/seaEP3364
	1	0.489	0.223	0.2	0.141	0.097	0.119	0.096		dome > GFP	0.5046
	2	0.52	0.201	0.189	0.245	0.09	0.098	0.088		d > chm.i	0.1948
	3	0.544	0.19	0.168	0.22	0.091	0.134	0.127		d > Gcn5.i	0.1883
	4	0.472	0.185	0.161	0.168	0.068	0.065	0.078		d > AcCoAS.i	0.1909
	5	0.49	0.173	0.183	0.173	0.053	0.092	0.066		d; whd1/whd1	0.0767
	6	0.534	0.225	0.206	0.189	0.078	0.127	0.132		d; whd1/ATPCL01466	0.104
	7	0.511	0.139	0.144	0.195	0.071	0.079	0.075		d; whd1/seaEP3364	0.0971
	8	0.537	0.198	0.183	0.193	0.089	0.098	0.085
	9	0.462	0.188	0.18	0.186	0.063	0.133	0.115
	10	0.487	0.226	0.269	0.199	0.067	0.095	0.109
	Average	0.5046	0.1948	0.1883	0.1909	0.0767	0.104	0.0971
	Standard Deviation	0.0286519	0.0268403	0.0336784	0.0283292	0.0145224	0.0234236	0.0226689
	Student's t-test		2.26708e-15	1.99037e-14	2.60096e-15	1.40017e-15	0.00683536	0.029739
		H3K9 Acetylation Western Blot Analysis
	n	OreR	whd1/whd1
	set 1	1	0.190278			OreR	1
	set 2	1	0.347335			whd1/whd1	0.311367
	set 3	1	0.396488
	Average	1	0.311367
	Standard Deviation	0	0.107707
	Student's t-test		0.00805601
	Mean fluorescense intensity of H3 labeling in progenitors
	n	Control H3	Ay>whd.i H3
	1	59.059	64.853
	2	46.919	53.806
	3	45.678	63.619
	4	35.489	49.983		Control H3	49.5943
	5	38.093	37.988		Ay>whd.i H3	50.5747
	6	53.582	45.509
	7	39.81	55.062
	8	57.6	44.808
	9	56.097	50.537
	10	63.616	39.582
	Average	49.5943	50.5747
	Standard Deviation	18.5249	17.241
	Student's t-test		0.818828
	Mean fluorescense intensity of H3K9 ac labeling in progenitors
	n	Control H3K9	Ay>whd.i H3K9
	1	121.695	41.819
	2	144.543	42.221
	3	112.788	18.48
	4	123.565	39.044		Control H3K9 ac	118.665
	5	109.388	32.734		Ay>whd.i H3K9 ac	35.7802
	6	130.289	30.877
	7	109.046	37.742
	8	107.518	49.535
	9	114.686	38.633
	10	113.13	26.717
	Average	118.665	35.7802
	Standard Deviation	11.6516	8.84775
	Student's t-test		2.23804e-12
	Mean fluorescense intensity of H4 ac labeling in progenitors
	n	Control H4 ac	Ay>whd.i H4
	1	117.54	53.024
	2	93.899	39.996
	3	115.086	42.723		Control H4 ac	116.705
	4	149.627	22.79		Ay>whd.i H4	37.0695
	5	108.341	31.763
	6	97.949	39.008
	7	128.747	32.898
	8	129.401	48.221
	9	114.976	39.194
	10	111.486	21.078
	Average	116.705	37.0695
	Standard Deviation	16.212	10.1811
	Student's t-test		1.08257e-09
