# Supplementary material for: Fatty acid β-oxidation is required for the differentiation of larval hematopoietic progenitors in Drosophila
Source: eLife. 2020 Jun 12;9:e53247. doi: 10.7554/eLife.53247 (PMC7347386; doi:10.7554/eLife.53247)
Supplement: Figure 7—source data 1. [file elife-53247-fig7-data1.xlsx]

## Sheet: Sheet1
	Differentiation level in Acetate feeding
	n	dome/+	d/+ +Acetate	d; whd1/whd1	d; whd1/whd1; +Acetate
	1	0.484	0.468	0.124	0.467		dome/+	0.4885
	2	0.497	0.453	0.087	0.411		d/+ +Acetate	0.4631
	3	0.469	0.544	0.083	0.388		d; whd1/whd1	0.0843
	4	0.498	0.419	0.059	0.488		d; whd1/whd1; +Acetate	0.4494
	5	0.508	0.428	0.079	0.452
	6	0.551	0.489	0.058	0.571
	7	0.499	0.591	0.075	0.429
	8	0.48	0.422	0.073	0.423
	9	0.421	0.414	0.131	0.487
	10	0.478	0.403	0.074	0.378
	Average	0.4885	0.4631	0.0843	0.4494
	Standard Deviation	0.032827	0.0619936	0.0245992	0.0572154
	Student's t-test		0.271838	3.18321e-16	2.57614e-10
	Western Blot
	Level of H3K9 acetylation in Acetate feeding
	n	OreR	OreR +Acetate	whd1/whd1	whd1/whd1 +Acetate
	Set 1	1	0.751655	0.474732	0.936207		OreR	1
	Set 2	1	0.727243	0.470518	1.08498		OreR +Acetate	0.754572
	set 3	1	0.784818	0.31622	0.690073		whd1/whd1	0.42049
	Average	1	0.754572	0.42049	0.903754		whd1/whd1 +Acetate	0.903754
	Standard Deviation	0	0.0288981	0.0903248	0.199445
	Student's t-test		0.00458955	0.00800082	0.0358251
	Western Blot
	Level of H3K9 acetylation in L-Carnitine feeding
		OreR	OreR +L-Carnitine
	Set 1	1	2.31052		OreR	1
	Set 2	1	2.3821		OreR +L-Carnitine	2.35891
	set 3	1	2.38411
	Average	1	2.35891
	Standard Deviation	0	0.0419166
	Student's t-test		0.000317003
	Level of H3K9 acetylation immunostaining in L-Carnitine feeding
	n	dome>GFP	dome>GFP +L-carnitine
	1	78.136	128.754
	2	66.061	162.644
	3	48.593	168.278
	4	76.142	116.204
	5	62.837	137.58		dome>GFP	65.5958
	6	77.363	140.317		dome>GFP +L-carnitine	137.564
	7	70.906	123.582
	8	56.59	129.88
	9	67.346	146.03
	10	51.984	122.373
	Average	65.5958	137.564
	Standard Deviation	10.5489	17.2265
	Student's t-test		1.07935e-08
	Level of H3K9 acetylation immunostaining in Acetate feeding
	n	dome/+	d/+ +Acetate	d; whd1/whd1	d; whd1/whd1; +Acetate
	1	104.596	104.143	77.342	116.768
	2	142.883	131.168	56.386	113.556
	3	123.453	120.319	51.62	105.657	dome/+	d/+ +Acetate	d; whd1/whd1	d; whd1/whd1; +Acetate
	4	142.959	88.934	59.953	143.994	123.505	113.527	66.1912	110.853
	5	132.941	108.265	60.197	106.308
	6	134.88	114.89	80.658	89.438
	7	93.684	108.883	69.58	126.797
	8	122.62	115.508	68.119	97.819
	9	127.393	125.13	74.749	106.352
	10	109.643	118.026	63.308	101.838
	Average	123.505	113.527	66.1912	110.853
	Standard Deviation	16.4225	11.8327	9.50839	15.5367
	Student's t-test		0.138142	1.27618e-07	1.31215e-06
