# Supplementary material for: Fatty acid β-oxidation is required for the differentiation of larval hematopoietic progenitors in Drosophila
Source: eLife. 2020 Jun 12;9:e53247. doi: 10.7554/eLife.53247 (PMC7347386; doi:10.7554/eLife.53247)
Supplement: Figure 8—figure supplement 1—source data 1. [file elife-53247-fig8-figsupp1-data1.xlsx]

## Sheet: Sheet1
		Mean fluorescense intensity of H3 labelling in progenitors
		n	dome>GFP/+	dome>GFP>UAS-BskDN
		1	88.254	79.627
		2	61.78	86.723
		3	64.952	56.05			dome>GFP/+	77.7811
		4	77.838	54.7			dome>GFP>UAS-BskDN	75.0639
		5	90.055	84.782
		6	71.268	99.182
		7	83.67	61.266
		8	79.569	62.258
		9	88.235	69.28
		10	72.19	96.771
		Average	77.7811	75.0639
		Standard Deviation	10.01	16.5601
		Student's t-test		0.663428
		Mean fluorescense intensity of H3K9 ac labelling in progenitors
		n	dome>GFP/+	dome>GFP>UAS-BskDN
		1	109.982	98.701
		2	139.783	63.853
		3	135.88	71.79
		4	177.25	52.73			dome>GFP/+	141.078
		5	93.568	88.837			dome>GFP>UAS-bskDN	78.6854
		6	129.775	95.26
		7	139.558	73.882
		8	134.889	72.278
		9	178.38	59.268
		10	171.712	110.255
		Average	141.078	78.6854
		Standard Deviation	28.007	18.7303
		Student's t-test		2.62308e-05
		Mean fluorescense intensity of H4ac labelling in progenitors
		n	dome>GFP/+	dome>GFP>UAS-bskDN
		1	144.719	87.282
		2	135.79	91.725
		3	121.881	84.551
		4	163.99	51.529			dome>GFP/+	151.769
		5	179.213	79.528			dome>GFP>UAS-bskDN	85.8533
		6	138.936	97.356
		7	169.724	78.293
		8	163.28	89.28
		9	171.782	104.489
		10	128.373	94.5
		Average	151.769	85.8533
		Standard Deviation	20.1889	14.4516
		Student's t-test		2.56498e-07
		Differentiation levels in UAS-bskDN and UAS-bskDN, whd-OE rescue
		n	dome/+	dome> UAS-bskDN	dome>whd-OE	dome>BskDN; whd-OE
		1	0.484	0.134	0.783	0.652
		2	0.45	0.081	0.825	0.639
		3	0.501	0.062	0.814	0.556
		4	0.551	0.094	0.733	0.597		dome>GFP/+	0.4916
		5	0.494	0.113	0.728	0.515		dome> UAS-bskDN	0.0999
		6	0.49	0.15	0.715	0.663		dome>whd-OE	0.7705
		7	0.473	0.086	0.82	0.516		dome>bskDN; whd-OE	0.5924
		8	0.475	0.059	0.698	0.58
		9	0.486	0.091	0.806	0.571
		10	0.512	0.129	0.783	0.635
		Average	0.4916	0.0999	0.7705	0.5924
		Standard Deviation	0.0268378	0.0306683	0.0476498	0.0540662
		Student's t-test		1.02115e-16	1.59834e-10	3.46625e-13
