# Supplementary material for: Fatty acid β-oxidation is required for the differentiation of larval hematopoietic progenitors in Drosophila
Source: eLife journal article supplement (doi:10.7554/elife.53247), 2020-06-12
Supplement: supp [file elife_poa_e53247_Figure_1_figure_supplement_2_source_data_1.xlsx]

## Sheet: Sheet1
	Mean fluorescense intensity of CG3902-YFP expression
	n	Pvf2lacZ+	dome+	dome+ Hml+
	1	34.531	49.551	24.979
	2	38.529	58.86	29.618
	3	44.655	55.205	34.369
	4	40.631	61.871	18.447		Pvf2lacZ+	dome+	dome+ Hml+
	5	42.428	52.686	28.514		39.0987	57.5261	30.1889
	6	41.202	70.45	39.591
	7	38.805	72.78	24.219
	8	42.991	56.643	33.412
	9	37.755	54.107	38.392
	10	29.46	43.108	30.348
	Average	39.0987	57.5261	30.1889
	Standard Deviation	4.24103	8.56233	6.22385
	Student's t-test		6.01669e-05	0.0026999
	Mean fluorescense intensity of LipidTOX labeling
		Pvf2lacZ+	dome+	dome+ Hml+
	1	24.794	73.887	59.345
	2	23.926	71.282	29.283
	3	21.144	50.228	53.003		Pvf2lacZ+	dome+	dome+ Hml+
	4	16.791	96.073	49.69		23.2962	68.2009	45.9175
	5	25.213	50.924	37.098
	6	22.621	56.88	36.497
	7	21.021	48.355	55.375
	8	19.138	84.396	49.61
	9	26.888	79.754	32.275
	10	31.426	70.23	56.999
	Average	23.2962	68.2009	45.9175
	Standard Deviation	4.1524	16.2004	11.0552
	Student's t-test		6.20383e-06	6.84244e-05
