# Supplementary material for: Fatty acid β-oxidation is required for the differentiation of larval hematopoietic progenitors in Drosophila
Source: eLife journal article supplement (doi:10.7554/elife.53247), 2020-06-12
Supplement: supp [file elife_poa_e53247_Figure_8_source_data_1.xlsx]

## Sheet: Sheet1
	Differentiation levels in bsk/JNK knockdown
	n	dome/+	dome>bskDN
	1	0.484	0.12
	2	0.497	0.17		dome/+	0.4924
	3	0.469	0.134		dome>bskDN	0.1573
	4	0.498	0.119
	5	0.528	0.187
	6	0.501	0.172
	7	0.499	0.139
	8	0.489	0.126
	9	0.481	0.261
	10	0.478	0.145
	Average	0.4924	0.1573
	Standard Deviation	0.0163449	0.0433078
	Student's t-test		5.83795e-11
	Fold change in levels of FAO enzymes transcripts
			whd		Mcad		Mtpα		scully		Mtpβ		yip2
		dome>UASGFP	dome>UAS-bskDN	dome>UASGFP	dome>UAS-bskDN	dome>UASGFP	dome>UAS-bskDN	dome>UASGFP	dome>UAS-bskDN	dome>UASGFP	dome>UAS-bskDN	dome>UASGFP	dome>UAS-bskDN
	set 1	1	0.53	1	0.96	1	0.92	1	1.08	1	0.923	1	0.87			whd	Mcad	Mtpα	scully	Mtpβ	yip2
	set 2	1	0.65	1	1.05	1	1.03	1	0.82	1	1.13	1	0.77		dome>UASGFP	1	1	1	1	1	1
	set 3	1	0.59	1	0.94	1	1.07	1	1.09	1	1.007	1	0.8		dome>UAS-bskDN	0.59	1.005	0.975	0.95	1.0265	0.82
	Average	1	0.59	1	1.005	1	0.975	1	0.95	1	1.0265	1	0.82
	Standard Deviation	0	0.06	0	0.0585947	0	0.0776745	0	0.15308	0	0.104111	0	0.051316			whd	Mcad	Mtpα	scully	Mtpβ	yip2
	Student's t-test		0.00706307		0.671024		0.895458		0.97334		0.770976		0.0242777		dome>UASGFP	0	0	0	0	0	0
															dome>UAS-bskDN	0.06	0.0585947	0.0776745	0.15308	0.104111	0.051316
	Differentiation levels in UAS-FOXO and UAS-FOXO,whd1 rescue
	n	dome/+	dome>UAS-FOXO	dome>GFP/+; whd1/+	dome>UAS-FOXO/ whd1
	1	0.545	0.91	0.329	0.673
	2	0.568	0.918	0.339	0.698
	3	0.617	0.871	0.398	0.752
	4	0.602	0.915	0.478	0.588	dome/+	0.5404
	5	0.573	0.931	0.374	0.681	dome>UAS-FOXO	0.8847
	6	0.505	0.817	0.488	0.739	dome>GFP/+; whd1/+	0.3828
	7	0.484	0.883	0.292	0.651	dome>UAS-FOXO/ whd1	0.6699
	8	0.462	0.892	0.403	0.591
	9	0.592	0.919	0.331	0.628
	10	0.456	0.791	0.396	0.698
	Average	0.5404	0.8847	0.3828	0.6699
	Standard Deviation	0.0595113	0.0466596	0.063911	0.0560485
	Student's t-test		5.77102e-11	2.1055e-05	3.84073e-09
	Differentiation levels in UAS-bskDN and UAS-bskDN +acetate rescue
	n	dome/+	dome/+ +Acetate	dome>bskDN	dome>bskDN +Acetate
	1	0.692	0.698	0.294	0.462
	2	0.621	0.533	0.391	0.553
	3	0.553	0.594	0.195	0.506
	4	0.616	0.499	0.263	0.598	dome/+	0.5885
	5	0.579	0.489	0.124	0.517	dome/+ +Acetate	0.5705
	6	0.637	0.559	0.302	0.409	dome>bskDN	0.2245
	7	0.529	0.613	0.178	0.484	dome>bskDN +Acetate	0.5011
	8	0.498	0.673	0.234	0.541
	9	0.572	0.454	0.151	0.419
	10	0.588	0.593	0.113	0.522
	Average	0.5885	0.5705	0.2245	0.5011
	Standard Deviation	0.0560064	0.0792272	0.088881	0.0590978
	Student's t-test		0.565514	1.31723e-08	4.72652e-07
	Differentiation levels in UAS-BSKDN and UAS-BSKDN +L-carnitine rescue
	n	dome/+	dome/+ +L-carnitine	dome>bskDN	dome>bskDN +L-carnitine
	1	0.618	0.883	0.283	0.623
	2	0.429	0.81	0.129	0.531
	3	0.509	0.739	0.267	0.471
	4	0.601	0.794	0.213	0.518	dome/+	0.57311
	5	0.524	0.893	0.191	0.515	dome/+ +L-carnitine	0.8554
	6	0.591	0.858	0.316	0.463	dome>bskDN	0.2117
	7	0.593	0.867	0.194	0.436	dome>bskDN +L-carnitine	0.4881
	8	0.595	0.892	0.138	0.488
	9	0.582	0.917	0.188	0.411
	10	0.689	0.901	0.198	0.425
	Average	0.5731	0.8554	0.2117	0.4881
	Standard Deviation	0.0705431	0.0566769	0.0603546	0.0625557
	Student's t-test		1.69035e-08	4.4954e-10	8.30704e-09
	Mean fluorescense intensity of H3 labeling in progenitors
	n	Control H3	Ay>GFP/+ H3
	1	29.05	35.596
	2	32.564	39.683
	3	40.96	45.716		Control H3	38.3839
	4	45.774	42.007		Ay>GFP/+ H3	39.7146
	5	52.288	33.299
	6	35.542	34.772
	7	38.062	31.603
	8	36.94	43.723
	9	34.936	46.638
	10	37.723	44.109
	Average	38.3839	39.7146
	Standard Deviation	6.65129	5.50691
	Student's t-test		0.632119
	Mean fluorescense intensity of H3K9 ac labeling in progenitors
	n	Control H3K9	Ay>GFP>bskDN H3K9
	1	51.059	15.395
	2	61.535	14.247
	3	58.48	18.557		Control H3K9	60.5146
	4	48.882	16.95		Ay>GFP>bskDN H3K9	20.4281
	5	71.639	20.535
	6	53.85	19.758
	7	48.294	22.75
	8	56.708	19.185
	9	77.916	27.742
	10	76.783	29.162
	Average	60.5146	20.4281
	Standard Deviation	11.2021	4.90246
	Student's t-test		1.91115e-07
	Mean fluorescense intensity of H4 ac labeling in progenitors
	n	Control H4 ac	Ay>GFP>bskDN H4 ac
	1	102.366	33.049
	2	84.39	22.341
	3	120.819	31.606		Control H4 ac	105.03
	4	110.833	18.977		Ay>GFP>bskDN H4 ac	26.0337
	5	85.286	21.974
	6	102.966	23.174
	7	112.845	21.286
	8	87.688	28.133
	9	127.504	31.072
	10	115.606	28.725
	Average	105.03	26.0337
	Standard Deviation	15.2349	5.03248
	Student's t-test		8.22495e-09
